1 **Bacterial genotypic and patient risk factors for adverse outcomes in *Escherichia coli***  
2 **bloodstream infections: a prospective molecular-epidemiological study**

3  
4 Elita Jauneikaite<sup>1,2\*</sup>, PhD, Kate Honeyford<sup>1,3\*</sup>, PhD, Oliver Blandy<sup>1</sup>, MSc, Mia Mosavie<sup>1</sup>, MSc, Max Pearson<sup>1</sup>,  
5 MSc, Farzan A. Ramzan<sup>1</sup>, PhD, Matthew J. Ellington<sup>1,4</sup>, D.Phil, Julian Parkhill<sup>5,6</sup>, PhD, Céire E Costelloe<sup>3</sup>, PhD,  
6 Neil Woodford<sup>1,4</sup>, PhD, and Shiranee Sriskandan<sup>1,7#</sup>, PhD

7  
8 <sup>1</sup>NIHR Health Protection Research Unit for Healthcare Associated Infections and Antimicrobial Resistance,  
9 Department of Infectious Disease, Imperial College London, London, UK

10 <sup>2</sup>Department of Infectious Disease Epidemiology, School of Public Health, Imperial College London, London, UK

11 <sup>3</sup>Global Digital Health Unit, Department of Primary Care and Public Health, School of Public Health, Imperial  
12 College London, London, UK

13 <sup>4</sup>NIS Laboratories, National Infection Service, Public Health England, UK

14 <sup>5</sup>Wellcome Sanger Institute, Hinxton, Cambridge, UK

15 <sup>6</sup>Department of Veterinary Medicine, University of Cambridge, Cambridge, UK

16 <sup>7</sup>Medical Research Council Centre for Molecular Bacteriology & Infection, Imperial College London, London, UK

17

18 \*These authors contributed equally

19 #Corresponding author: Prof Shiranee Sriskandan (email: [s.sriskandan@imperial.ac.uk](mailto:s.sriskandan@imperial.ac.uk), phone: +44 (0)208 3313  
20 3135)

21

22

23 **Abstract**

24 **Background**

25 *Escherichia coli* bloodstream infections have increased rapidly in the UK, for reasons that are unclear. The  
26 relevance of highly fit, or multi-drug resistant lineages such as ST131 to overall *E. coli* disease burden remains to be  
27 fully determined. We set out to characterise the prevalence of *E. coli* multi-locus sequence types (MLST) and  
28 determine if these were associated with adverse outcomes in an urban population of *E. coli* bacteraemia patients.

29

30 **Methods**

31 We undertook whole genome sequencing of *E. coli* blood isolates from all patients with diagnosed *E. coli*  
32 bacteraemia in north-west London from July 2015 to August 2016 and assigned multi-locus sequence types to all  
33 isolates. Isolate sequence types were linked to routinely collected antimicrobial susceptibility, patient demographic,  
34 and clinical outcome data to explore relationships between the *E. coli* sequence types, patient factors, and outcomes.

35

36 **Findings**

37 A total of 551 *E. coli* genomes were available for analysis. More than half of these cases were caused by four *E. coli*  
38 sequence types: ST131 (21%), ST73 (15%), ST69 (9%) and ST95 (8%). *E. coli* genotype ST131-C2 was associated  
39 with non-susceptibility to quinolones and third-generation cephalosporins, and also to amoxicillin, augmentin,  
40 gentamicin and trimethoprim. An association between the ST131-C2 lineage and longer length-of-stay was detected,  
41 although multivariable regression modelling did not demonstrate an association between *E. coli* sequence type and  
42 mortality. However, a number of unexpected associations were identified, including gentamicin non-susceptibility,  
43 ethnicity, and sex that might influence mortality and length-of-stay, requiring further research.

44

45 **Interpretation**

46 Although *E. coli* sequence type was associated with antimicrobial non-susceptibility patterns and length-of-stay, we  
47 did not find that *E. coli* sequence type was associated with increased mortality. Where ST131 is prevalent, caution is  
48 required when pairing beta-lactam agents with gentamicin or using single agent aminoglycosides.

49

50 **Funding**

51 UK NIHR HPRU, Wellcome Trust, Rosetrees Trust, Stonegate Trust.

52

53

54 **Keywords:** *Escherichia coli*, ST131, bacteraemia, risk factors, antimicrobial resistance

55

56

## 57 **Research in context**

### 58 **Evidence before this study**

59 *E. coli* is the leading cause of bacteraemia in adults, with consequent major impact on patient morbidity and  
60 mortality, as well as cost of care. Identification of microbial and patient factors that contribute to severity from *E.*  
61 *coli* bacteraemia could inform clinical guidelines and improve outcomes. We searched PubMed for articles  
62 published in English between 1<sup>st</sup> of Jan 1999 to 3<sup>rd</sup> of May 2021 using the following terms: (“*Escherichia coli*” OR  
63 “*E. coli*”) AND (“bacteraemia” OR “bloodstream infection”) AND (“genotype” OR “multi-locus sequence typing”  
64 OR “MLST”). We screened titles, abstracts, and bibliographies of relevant articles to identify reports that examine  
65 microbial factors that influence outcome. Previous studies have examined the association between a narrow range of  
66 *E. coli* lineages carrying specific antimicrobial resistance genes and prior antibiotic consumption, patient  
67 comorbidities, and mortality. Only two previous studies have examined the association of a wider range of *E. coli*  
68 sequence types (via MLST or whole genome sequencing) with clinical disease phenotype. We provide an integrated  
69 observational analysis of *E. coli* sequence types, patient demographic data, and disease outcomes.

70

### 71 **Added value of this study**

72 We provide whole genome sequences from an un-biased collection of 551 *E. coli* strains causing consecutive  
73 bloodstream infections (BSI) in a one-year period in London. The study confirms ST131 to be the single leading  
74 BSI-causing genotype, albeit accounting for just 21% of infections. Only half of these were from the so-called  
75 multi-drug resistant ST131-C2 lineage however, suggesting factors other than antimicrobial resistance alone  
76 contribute to fitness of ST131, and other currently dominant lineages. The study provides a valuable resource to link  
77 genome sequence to antimicrobial resistance phenotypes and evaluates the contribution of both bacterial sequence  
78 type and patient factors to disease outcome. *E. coli* ST131 subclade C2 was associated with non-susceptibility to

79 multiple antibiotics as well as a longer length-of-stay, underlining a value in sequence-type surveillance, but we did  
80 not detect an association with mortality. Multi-variate analysis unexpectedly identified ethnicity as a potential  
81 contributor to 90-day mortality, mandating further investigation, while microbial gentamicin resistance was also  
82 linked to adverse outcome.

83

#### 84 **Implications of all available evidence**

85 *E. coli* bloodstream infections continue to rise in the UK, despite implemented strategies aimed at reducing *E. coli*  
86 invasive infections and antimicrobial resistance. Certain *E. coli* lineages are more likely to be multidrug-resistant or  
87 associated with specific infection types, however a more detailed understanding of changes in these pathogenic  
88 lineages over time in vulnerable populations is needed. Although multi-drug resistant lineages such as ST131-C2  
89 contribute to prolonged length-of-stay, factors other than *E. coli* genotype may have a greater role to play in final  
90 outcome. While co-morbidities play a major role in mortality from *E. coli* bacteraemia, other demographic factors  
91 require attention. A more comprehensive analysis of associations between *E. coli* genotype, patient factors,  
92 antimicrobial resistance phenotypes and clinical outcomes could inform prescribing guidelines for both urinary tract  
93 and invasive *E. coli* infections. Such information will further serve as a potential driver for developing and  
94 implementing lineage-specific *E. coli* vaccines in the future.

95

96

#### 97 **Introduction**

98 *Escherichia coli* is, by far, the most common causative organism in bloodstream infections (BSIs) [1] and its  
99 incidence is increasing. Between 2014-18 a 27.2% increase in *E. coli* BSIs was recorded in England, Wales and  
100 Northern Ireland, rising from 55.2/100,000 to 70.7/100,000 cases [2]. In-hospital mortality of *E. coli* BSI is reported  
101 to be 13-25% [3-5] and prolonged length-of-stay is common [5-7]. Thus, with over 40,000 cases per year [8], the  
102 overall burden of *E. coli* BSIs on individuals and healthcare is considerable. Additionally, non-susceptibility to  
103 several commonly-used antimicrobial agents has increased among both community- and hospital-onset *E. coli* blood  
104 isolates [7,9].

105

106 While many studies have described the factors that may influence outcome from sepsis and *E. coli* BSIs [6,7], few  
107 have examined whether strain sequence type is relevant. Extraintestinal pathogenic *E. coli* (ExPEC) form a subgroup  
108 of *E. coli* that have sufficient virulence to cause urinary and bloodstream infections [10]. The most common disease-  
109 causing clones of ExPEC in the UK have been reported to be ST131, ST73, ST95, ST69 and ST12 [11]. Globally,  
110 interest has focused on emergence of the ST131 *E. coli* lineage, in particular the multidrug-resistant clade ST131-  
111 C2/H30-Rx, which is associated with production of extended-spectrum beta-lactamases (ESBL) and resistance to  
112 fluoroquinolones [12–14]. Although ST131 to date has not outcompeted other common clones [15], the emergence  
113 of the *E. coli* ST131-H30-Rx (also known as ST131-C2) sub-lineage has reportedly been associated with more  
114 severe infections [16] and characterised as highly pathogenic [14]. We conducted a one-year prospective study to  
115 investigate the burden of infection due to specific *E. coli* genotypes and to determine if *E. coli* genetic background  
116 was associated with adverse outcome in bacteraemia patients.

117

118

## 119 **Materials and Methods**

### 120 *Case definitions, demographic and clinical outcome data retrieval*

121 Between July 2015 and August 2016, we prospectively collected *E. coli* isolates causing bloodstream infections  
122 submitted to the diagnostic laboratory of a large NHS teaching Trust in North West London, serving a population of  
123 ~2,000,000 people including adjacent NHS Trust hospitals.

124

125 *E. coli* bacteraemia cases were identified when a positive blood culture yielded growth of *E. coli*. Any *E. coli*  
126 bacteraemia events recorded within 30 days of an earlier *E. coli*-positive blood culture were considered duplicates  
127 and not included in the analysis; those recorded >30 days after were considered new infections and were included in  
128 the study as cases. *E. coli* bacteraemia cases were considered to be hospital-onset (HO) if the *E. coli*-positive blood  
129 culture was taken after the second calendar day of admission to hospital; or community-onset (CO) if the *E. coli*-  
130 positive blood culture was taken on the first or second day of admission [17]. The following demographic  
131 information was collected using an electronic patient administration system (PAS): age, sex, ethnicity, co-  
132 morbidities, post-infection length-of-stay (Figure S1). A modified Elixhauser comorbidity score was calculated for  
133 each case [18]. The primary outcome was all-cause mortality within 7, 30 and 90 days of positive blood culture date,

134 derived by linking cases to Office for National Statistics (ONS) data. Post-infection length-of-stay was determined  
135 from hospital PAS data but was highly skewed. A binary indicator of prolonged length-of-stay ( $\geq 7$ ;  
136 <https://improvement.nhs.uk/resources/reviewing-str>) was used as a secondary patient outcome. Detailed  
137 demographic and length-of-stay data were not available for patients admitted to the adjacent NHS Trust hospitals.

138

### 139 ***Antibiotic susceptibility testing and multi-locus sequence typing***

140 Antibiotic susceptibility testing results for *E. coli* blood isolates were obtained from the Microbiology Data  
141 warehouse. Testing was carried out as part of the routine clinical care following European Committee on  
142 Antimicrobial Susceptibility Testing (EUCAST) methodology ([https://eucast.org/ast\\_of\\_bacteria/](https://eucast.org/ast_of_bacteria/)) for amoxicillin,  
143 augmentin, trimethoprim, fluoroquinolones (ciprofloxacin), third-generation cephalosporins (ceftazidime,  
144 cefotaxime and ceftriaxone), carbapenems (imipenem, meropenem, ertapenem) and aminoglycosides (gentamicin).  
145 For analysis, intermediate and resistant isolates were combined and classified as 'non-susceptible'. Isolates which  
146 were non-susceptible to three classes of antimicrobial agents (ciprofloxacin, third-generation cephalosporins and  
147 gentamicin) were classed as multidrug-resistant (MDR). Amoxicillin, augmentin, and trimethoprim susceptibility  
148 data were not available for patients admitted to adjacent NHS Trust hospitals. *E. coli* isolates were processed for  
149 whole genome sequencing, and genotypes based on multi-locus sequence types (MLST) were determined as  
150 described in Supplementary Methods.

151

### 152 ***Statistical analyses***

153 Chi-squared and Fisher's exact tests were used to assess associations between *E. coli* sequence type, antibiotic  
154 susceptibility results and patient demographic data (sex and age). Multiple logistic regression was used to model the  
155 outcomes, mortality within 7, 30 and 90 days and length-of-stay. As mortality is a rare outcome, the Firth method  
156 [19,20] was used in mortality models to reduce the small sample bias in Maximum Likelihood Estimation. *E. coli*  
157 genotype was included as a categorical model in all models. All patient characteristics were considered as potential  
158 confounders for both outcomes and were included in all models. To isolate potential confounding introduced by  
159 antibiotic susceptibility in *E. coli* sequence types, we included antibiotic susceptibility results for each antibiotic one  
160 at a time in models. All the tests were two-sided, and  $p < 0.05$  was considered statistically significant. Data  
161 processing and analyses were performed using R studio (<http://www.r-project.org>).

162

163 ***Ethics statement***

164 The collection of microbial isolates and linkage to routinely obtained healthcare data prior to anonymisation was  
165 approved by an NHS Research Ethics Committee (West London Research Ethics Committee,  
166 formerly Hammersmith and Queen Charlotte's & Chelsea Research Ethics Committee). Ethics approval reference  
167 number 06/Q0406/20.

168

169

170 **Results**

171 ***Description of one-year E. coli bloodstream infections in north-west London***

172 A total of 551 *E. coli* bacteraemia cases, where *E. coli* isolates were available for analysis, were detected between  
173 July 2015 and August 2016 (Figure S1). Basic demographic information (age and sex) was available for 537 patients  
174 (Figure S1). Of these, 43% were male (n=233) and 57% were female (n=304). Sixty percent of *E. coli* bacteraemia  
175 cases were  $\geq 65$  years old (n=321), with more female patients represented in this age group than male patients (Table  
176 S1). Genomic MLST analysis identified 114 different MLST among *E. coli* blood isolates, of which 21% belonged  
177 to ST131 (n=115), 15% to ST73 (n=77), 9% to ST69 (n=51) and 8% to ST95 (n=45). As such, over half of all  
178 isolates belonged to ST131, ST73, ST69 or ST95. Although ST131 was the single largest lineage among  
179 bacteraemia isolates, within the ST131 lineage there were 60/115 isolates that belonged to the ST131-C2 sub-  
180 lineage (11.2% of total) and the remaining 55 (10.2% of the total) isolates from “other” ST131 sub-lineages  
181 (including A, B and C1).

182

183 ***E. coli genotypes (MLST) and antimicrobial susceptibility***

184 Results of routinely conducted antibiotic susceptibility testing to five key antibiotic groups (fluoroquinolones, third-  
185 generation cephalosporins, carbapenems, gentamicin and tazocin) were available for 537 isolates, while  
186 susceptibilities to amoxicillin, augmentin and trimethoprim were available for 249 isolates (Figure S1). From the  
187 five antibiotic groups tested, 26.7% of isolates (n=143/537) were non-susceptible to fluoroquinolones, 19.7% of  
188 isolates (n=106/537) were non-susceptible to third-generation cephalosporins, and 15.1% (n=81/537) were non-  
189 susceptible to gentamicin (Table S2). Non-susceptibility to amoxicillin (63.9%, n=159/249), trimethoprim (44.6%,

190 n=111/249) and augmentin (30.5%, n=76/249) was frequently noted. Non-susceptibility to any of the antibiotics  
191 tested (except for carbapenems due to low isolate numbers tested) was significantly associated with the *E. coli*  
192 MLST ( $p<0.001$ ), while only non-susceptibility to amoxicillin was not associated with the MLST ( $p>0.05$ ) (Table  
193 S2). As expected, ST131-C2 showed the highest levels of non-susceptibility to all antibiotics tested (Table S2).  
194 ST131-C2 accounted for approximately one third of isolates that were non-susceptible to third-generation  
195 cephalosporins and quinolones; and accounted for approximately one quarter of isolates that were non-susceptible to  
196 gentamicin, tazocin, or augmentin. Although non-susceptibility to trimethoprim was observed frequently, in 44.6%  
197 of all *E. coli* isolates tested (111/249), it was notable that 81.5% of ST131-C2 isolates (n=22/27) were non-  
198 susceptible to trimethoprim (Table S2).

199

#### 200 ***Association between E. coli MLST and case characteristics***

201 *E. coli* MLST was linked to clinical demographic data in 300 cases. Initial analysis indicated that ST69 and ST95  
202 isolates were more frequently identified in younger (<65 yrs) female patients, while ST131 isolates were more likely  
203 to affect male patients (Table 1). There was, however, no clear association between specific *E. coli* MLST and age  
204 or ethnicity.

205

206 Elixhauser co-morbidity scores exceeded 5 for 53.6% of the patients (Table 1). We observed that patients infected  
207 with ST131, ST73 and ST95 were more likely to have an Elixhauser score >6, compared to patients infected with  
208 other STs (Table 1). Within the ST131 lineage, patients infected with “ST131-other” isolates were more likely to  
209 have higher Elixhauser score than those infected with ST131-C2 isolates (Table 1).

210

211 Based on onset of *E. coli* bacteraemia in relation to time of admission to hospital, 75% of patients had community-  
212 onset *E. coli* bacteraemia (Table 1). *E. coli* MLST were, in general, proportionately distributed among community-  
213 and hospital-onset cases, except for ST131 isolates that were disproportionately associated with hospital-onset cases;  
214 40% of ST131 isolates were hospital-onset (Table 1). Overall, the ST131 lineage accounted for 34.6% of all  
215 hospital-onset cases compared with 16.4% of all community-onset cases. In contrast, a majority (90%) of  
216 bacteraemia cases caused by ST95 were found to be community-onset (Table 1).

217



218 ***Association between E. coli MLST and patient outcome***

219 Over one-third (34%) of study patients with *E. coli* bacteraemia died within one-year: 7% died within 7 days of  
220 infection, 11% died within 30 days and 16% within 90 days (Table 2). There was no association between *E. coli*  
221 MLST and death within 7 days or 30 days in the cohort tested, however, analysis may have been affected by low  
222 numbers within each *E. coli* genotype group, and mortality being lower than predicted, precluding further analysis at  
223 the early time points (Table 2). Logistic regression analysis showed increased risk of death within 90 days for  
224 patients infected with *E. coli* genotype ‘ST131-other’ when compared to all other STs (OR:2.58; 95%CI:1.04, 6.19).  
225 However, once the model was adjusted for patient characteristics, no evidence for any association between *E. coli*  
226 genotype and 90-day mortality was found (Table 3). In our study, age and sex did not influence risk of 90-day  
227 mortality, although comorbidity, as described by an Elixhauser score of >14, was highly influential. Unexpectedly,  
228 we found that *E. coli* non-susceptibility to gentamicin was associated with increased odds of death within 90 days  
229 (OR:3.32, 95%CI:1.17, 9.72) after adjusting for patient characteristics and *E. coli* MLST (Table 3). Mortality at all  
230 time points was higher in patients infected by isolates that were non-susceptible to gentamicin (7 days, 12.8%; 30  
231 days, 15.4%; 90 days, 25.6%), compared with patients with isolates that were susceptible, (7 days, 6.1%; 30 days,  
232 10.3%; 90 days, 14.2%) although numbers at the earlier time points were too low for inclusion in comparative  
233 analysis. Further analysis also suggested that patients of black ethnicity had increased odds of mortality within 90  
234 days compared to patients of white ethnicity: Those infected with *E. coli* strains that were non-susceptible to  
235 gentamicin or tazocin were associated with increased odds of death within 90 days (OR: 2.98, 95%CI:1.03,8.56 and  
236 OR:3.09, 95%CI:1.02,9.26, respectively; Table 3).

237  
238 Median post infection length-of-stay (PILOS) was found to be 10 days for *E. coli* bacteraemia patients (Table 2).  
239 Overall patients with bacteraemia caused by ST131 (irrespective of clade) were more likely to stay longer in  
240 hospital, with longest PILOS for patients infected with ST131-C2 isolates (median 18.5 days) and ST131-other  
241 isolates (median 12.5 days) (Table 2). Unadjusted logistic regression suggested that patients infected with ST131-  
242 C2 had six times greater odds of having an extended length-of-stay (OR:6.46 95%CI: 2.02 to 32.64) and patients  
243 infected with ST69 had a three-fold increase in odds of a long length-of-stay (OR:2.85 95%CI:1.07 to 8.52)  
244 compared with patients who were infected with ‘other’ ST *E. coli* (Table 4). We did not find evidence of a specific  
245 association between antibiotic non-susceptibility and length-of-stay. Female patients had a three-fold lower risk of

246 an extended length-of-stay compared with male patients (OR:0.30 95%CI:0.16, 0.55) (Table 4). Patients with  
247 hospital-onset infection had higher odds of an extended length-of-stay (OR:2.69 95%CI:1.28, 6.08) although these  
248 patients may have required treatment for the condition that initiated the original admission to hospital (Table 4).  
249 When we examined the smaller subset of patients for whom additional antimicrobial susceptibility data were  
250 available, we were unable to detect any association between non-susceptibility to trimethoprim, amoxicillin or  
251 augmentin and either PILOS or death within 90 days (Tables S3-S4).

252

253

## 254 **Discussion**

255 Our study is one of the largest to comprehensively examine the association between *E. coli* genotype and  
256 bloodstream infection, examining over 500 consecutive unselected cases of bacteraemia. Over one fifth of cases  
257 could be attributed to isolates of the ST131 lineage, around half of which belonged to the multidrug-resistant sub-  
258 clone ST131-C2 (also known as ST131-*H30Rx*). It has been reported that successful spread of ST131 clades was  
259 due to gain of virulence-associated genes, followed by the acquisition of specific antibiotic resistance [21]. Although  
260 the ST131-C2 clade is reported to be highly pathogenic [14] we did not find clinical-epidemiological evidence to  
261 support this in our patient population when mortality was used as a surrogate for virulence and pathogenicity; the  
262 most influential factor was patient comorbidity.

263

264 In contrast to mortality, when extended length of hospital stay was considered, certain *E. coli* genotypes, including  
265 ST131-C2, were strongly associated with prolonged length-of-stay, after adjusting for patient characteristics. This  
266 observation could potentially be explained by the non-susceptibility of ST131-C2 isolates to available oral  
267 antimicrobials that would otherwise be used to expedite patient discharge after initial intravenous therapy.  
268 Interestingly, bloodstream infections due to ST69 were also associated with a prolonged length-of-stay. Based on  
269 the data available, there was no evidence that non-susceptibility to multiple antibiotics alone was associated with  
270 extended length-of-stay although our ability to detect such a difference may have been limited by study size.

271

272 A number of other studies have examined the factors that influence outcome following *E. coli* bacteraemia. Most  
273 have identified the importance of comorbidity and age on mortality. Some have identified factors that are amendable

274 to intervention such as timing of effective antibiotics [22,23]. Only two have examined the role of bacterial sequence  
275 type, but failed to identify an association with adverse outcome such as mortality [16,24]. The role of strain  
276 genotype in mortality in invasive bacterial infections caused by other species is seen to reflect a salient role for the  
277 bacterium in pathogenesis[25]. The lack of identifiable link to any one genotype in the current study may reflect that  
278 *E. coli* is largely an opportunistic pathogen, and emergent lineages may simply represent strain types that are well-  
279 adapted to colonise the gut or cause disease in the elderly and those with comorbidity. *E. coli* is the leading cause of  
280 bloodstream infection in the UK and will account for a majority of cases that are designated as sepsis; factors that  
281 influence sepsis outcome will therefore be dominated by the largely host-related factors that impact *E. coli*  
282 outcome[6,7].

283  
284 Genotyping of the *E. coli* isolates in this study also provided insight into the MLST-specific associations with  
285 markers of antimicrobial resistance. A retrospective study undertaken in north-west London highlighted an  
286 unexplained increase in quinolone non-susceptibility in *E. coli* bacteraemia isolates 2011-2015 [7]. The ST131-C2  
287 sub-lineage is known to be associated with non-susceptibility to quinolones, third-generation cephalosporins and  
288 gentamicin [26] and this was confirmed in our study, as was non-susceptibility to amoxicillin (85%), and augmentin  
289 (67%). These antibiotics are preferentially used when treating *E. coli* bloodstream infections, however the  
290 emergence of ST131-C2 and other ESBL-producing Gram-negative bacteria has led to increasing empiric use of  
291 carbapenem agents or combination regimens that include aminoglycosides. Our frequent finding of gentamicin non-  
292 susceptibility in ST131 isolates (34%) points to a risk in the latter approach in populations where ST131-C2 is  
293 present. Although we did not specifically examine amikacin susceptibility in this study, it would appear that  
294 alternate regimens that include amikacin would be safer [27]. Our wider phenotypic testing against antimicrobials  
295 that are used in the community, for urinary tract rather than blood infections, further demonstrated that a striking  
296 proportion (>80%) of ST131-C2 isolates are trimethoprim resistant. Trimethoprim was recommended for empiric  
297 management of uncomplicated urinary tract infection until 2018 and we speculate that this may have contributed to  
298 population emergence of ST131 in those with frequent urosepsis and, in part, contributed to the predominance of  
299 ST131-C2 in bacteraemia cases.

300

301 Multivariable regression analysis unexpectedly highlighted an association between gentamicin resistance and  
302 increased odds of 90-day mortality (OR:3.32, 95% CI:1.17 to 9.72). Mortality at earlier time points also appeared  
303 greater in this group of patients, although the low numbers preclude statistical evaluation (at 7 days, gentamicin  
304 susceptible 6.1% versus non-susceptible 12.8%; at 30 days, gentamicin susceptible 10.3% versus non-susceptible  
305 15.4%). Aminoglycosides are frequently used as adjuncts to beta-lactam antimicrobials in empiric management of  
306 suspected sepsis, to avoid use of broader spectrum agents such as carbapenems. In our study, 27% of isolates  
307 resistant to augmentin were also resistant to gentamicin, and 47% isolates resistant to cephalosporins were resistant.  
308 Empiric single agent aminoglycoside therapy has previously been proposed as treatment for suspected urinary tract  
309 infection, although there is no evidence to support this approach in the setting of sepsis [28]. In either case, the  
310 proposed regimes will fail to achieve microbiological clearance of an aminoglycoside resistant ESBL-producing *E.*  
311 *coli* infection. Our observation of a three-fold increased risk of death in such cases underlines the importance of  
312 local surveillance of resistance patterns and adjustment of protocols accordingly, for example use of amikacin rather  
313 than gentamicin in a dual-agent regimen, and ensuring antibiotic regimens are initiated and adjusted promptly[22].

314  
315 Unexpectedly, the multivariable models also identified black ethnicity as a predictor of mortality; this could not be  
316 explained by patient comorbidities or specific *E. coli* lineages. It is feasible that ethnicity may play a role in late  
317 recognition of bacteraemia with consequent impact on management and therefore sepsis outcomes. Ethnicity is a  
318 complex trait that has frequently been associated with increased sepsis mortality in studies undertaken in North  
319 America [29]. In our study, black ethnicity was associated with a mortality of 6% at 7d, 18.2% at 30 days, and  
320 33.3% at 90 days, in contrast to white ethnicity where mortality was 6.9%. 8.3% and 11.7% at the same time points  
321 respectively albeit that numbers were too low at earlier time points to analyse. We do not know if similar data exist  
322 for other infections, or other types of hospital admission in the UK, however the recent COVID-19 pandemic has  
323 highlighted the role of inequality in healthcare outcomes [30]. Socio-economic status and travel history were not  
324 collected in our study, and we cannot rule out the possibility that specific groups may be over-represented among  
325 patients from long term care facilities or specific healthcare settings, for example dialysis or haematology. Our  
326 findings mandate more detailed study of the impact that ethnicity and other social factors might play in *E. coli*  
327 bacteraemia outcome within the UK.

328

329 The analysis also revealed that female patients were three times less likely to have a prolonged length-of-stay  
330 compared to male patients, even when adjusted for confounding factors, resonating with findings in an earlier  
331 national retrospective cohort study [5]. Length-of-stay was also markedly prolonged in those patients with hospital-  
332 onset *E. coli* bloodstream infections, as found in a previous retrospective study carried out in our NHS Trust [7]:  
333 The models applied in the current work accounted for hospital onset and comorbidities, but not the original reason  
334 for hospital admission which may in itself be the main driver for prolonged length-of-stay. There may also be  
335 important associations between reason for admission, onset of infection and gender. Larger samples and more  
336 detailed information would allow these more complex associations and possible interactions to be examined.

337  
338 There are limitations to our study. The study took place over one-year and was based in an urban and socially  
339 diverse area in London, hence, our findings might not be relevant to other settings. The study was under-powered to  
340 detect significant differences in mortality between *E. coli* genotype as the observed mortality at 30d was much lower  
341 than predicted; nonetheless, it was clear that ST131-clade C alone was not hypervirulent. Ethnicity is self-reported  
342 with missing data in many cases, and we had no information on the social status of the patients to adjust for in the  
343 analysis of association between *E. coli* genotype, severity of the infection and ethnicity. Information on other risk  
344 factors such as previous antibiotic exposure or transfer from other facilities (such as elderly care or long-term care  
345 facilities) was not available to include in our analyses. Finally, although our study included over 500 cases of  
346 bloodstream infection and isolates, we only had full outcome data for 300 patients, limited to the local NHS Trust  
347 and antimicrobial susceptibility testing was limited to the phenotypic tests reported by the local diagnostic  
348 laboratory.

## 349 350 **Conclusions**

351 One in five *E. coli* bloodstream infections occurring in north-west London arise from the *E. coli* ST131 lineage, half  
352 of which can be assigned to multi-drug resistant clade ST131-C2. There was no evidence that clade ST131-C2 was  
353 linked to increased mortality, indeed, there was a trend for other ST131 infections to have higher mortality. The  
354 main determinants of bacteraemia outcome were comorbidity-related, while bacterial MLST was strongly linked to  
355 antimicrobial resistance phenotype and length-of-stay. Future work should aim to recruit a larger cohort of

356 bloodstream infection cases and isolates to examine the potential roles of ethnicity, strain type and resistance  
357 phenotype with outcome.

358

359

### 360 **Acknowledgements**

361 SS acknowledges the support of the NIHR Imperial Biomedical Research Centre (BRC). EJ is a  
362 Rosetrees/Stoneygate 2017 Imperial College Research Fellow (M683). CEC is supported by a personal NIHR  
363 Career Development Fellowship (NIHR-2016-090-015). Imperial College London is grateful for the support from  
364 the North West London NIHR Applied Research Collaboration. The funders had no role in study design or writing.

365

366

### 367 **Funding**

368 The research was funded by the National Institute for Health Research Health Protection Research Unit (NIHR  
369 HPRU) in Healthcare Associated Infections and Antimicrobial Resistance at Imperial College London in partnership  
370 with Public Health England (HPRU-2012-10047). This report is independent research funded by the National  
371 Institute for Health Research. The views expressed in this publication are those of the author(s) and not necessarily  
372 those of the NHS, the National Institute for Health Research, the Department of Health and Social Care or Public  
373 Health England. NW and MJE were also supported by PHE and the Joint Programming Initiative on Antimicrobial  
374 Resistance (JPIAMR) and the Medical Research Council (MRC) as part of the 'ST131TS Consortium' under grant  
375 code MR/R002843/1. The funding sources had no role in study design, data collection, analysis, or decision to  
376 submit the manuscript for publication.

377

378

### 379 **Author contributions**

380 EJ, ME, NW and SS contributed to the study design. KH, OB, EJ, SS and CC verification of methods and data  
381 analysis. EJ performed bioinformatics analysis. OB, KH did statistical analysis. OB, KH, MM, FR, MP, JP and EJ  
382 contributed to data collection and preparation of samples for whole genome sequencing. OB and SS wrote the ethics

383 application and got the approval. EJ, KH and SS took the lead in writing the manuscript. All authors provided  
384 critical feedback of the results and review of the manuscript.

385

386

### 387 **Conflict of interests**

388 JP is a paid consultant to Next Gen Diagnostics Llc. MJE and NW are members of PHE's Antimicrobial Resistance  
389 and Healthcare Associated Infections Reference Unit, which has received financial support for conference  
390 attendance, lectures, research projects, or contracted evaluations from numerous sources, including Accelerate  
391 Diagnostics, Achaogen Inc, Allegra Therapeutics, Amplex, AstraZeneca UK Ltd, AusDiagnostics, Basilea  
392 Pharmaceutica, Becton Dickinson Diagnostics, bioMérieux, Bio-Rad Laboratories, British Society for Antimicrobial  
393 Chemotherapy, Cepheid, Check-Points B.V., Cubist Pharmaceuticals, Department of Health, Enigma Diagnostics,  
394 the European Centre for Disease Prevention and Control, Food Standards Agency, GenePOC, GlaxoSmithKline  
395 Services Ltd, Helperby Therapeutics, Henry Stewart Talks, International Health Management Associates Ltd,  
396 Innovate UK, Kalidex Pharmaceuticals, Melinta Therapeutics, Merck Sharpe and Dohme, Meiji Seika Pharma Co  
397 Ltd, Mobidiag, Momentum Biosciences Ltd, Neem Biotech, NIHR, Nordic Pharma Ltd, Norgine Pharmaceuticals,  
398 Paratek, Rabiotech Rx, Rempex Pharmaceuticals Ltd, Roche, Rokitan Ltd, Smith and Nephew UK Ltd, Shionogi and  
399 Co Ltd, Tetrphase Pharmaceuticals, Trius Therapeutics, VenatoRx Pharmaceuticals, Wockhardt Ltd, and the World  
400 Health Organization. All other authors have no competing interest to declare.

401

402

### 403 **References**

- 404 [1] Wilson J, Elgohari S, Livermore DM, Cookson B, Johnson A, Lamagni T, et al. Trends among pathogens  
405 reported as causing bacteraemia in England, 2004-2008. *Clin Microbiol Infect* 2011;17.  
406 <https://doi.org/10.1111/j.1469-0691.2010.03262.x>.
- 407 [2] Public Health England. Laboratory surveillance of *Escherichia coli* bacteraemia in England, Wales and  
408 Northern Ireland: 2018. Health Protection Report, Volume 13 Number 37, 18 October 2019.
- 409 [3] Vihta KD, Stoesser N, Llewelyn MJ, Quan TP, Davies T, Fawcett NJ, et al. Trends over time in *Escherichia*  
410 *coli* bloodstream infections, urinary tract infections, and antibiotic susceptibilities in Oxfordshire, UK,

- 411 1998–2016: a study of electronic health records. *Lancet Infect Dis* 2018. <https://doi.org/10.1016/S1473->  
412 3099(18)30353-0.
- 413 [4] Bhattacharya A, Nsonwu O, Johnson AP, Hope R. Estimating the incidence and 30-day all-cause mortality  
414 rate of *Escherichia coli* bacteraemia in England by 2020/21. *J Hosp Infect* 2018;98.  
415 <https://doi.org/10.1016/j.jhin.2017.09.021>.
- 416 [5] Naylor NR, Pouwels KB, Hope R, Green N, Henderson KL, Knight GM, et al. The health and cost burden  
417 of antibiotic resistant and susceptible *Escherichia coli* bacteraemia in the English hospital setting: A national  
418 retrospective cohort study. *PLoS One* 2019. <https://doi.org/10.1371/journal.pone.0221944>.
- 419 [6] Lillie PJ, Johnson G, Ivan M, Barlow GD, Moss PJ. *Escherichia coli* bloodstream infection outcomes and  
420 preventability: a six-month prospective observational study. *J Hosp Infect* 2019;103.  
421 <https://doi.org/10.1016/j.jhin.2019.05.007>.
- 422 [7] Blandy O, Honeyford K, Gharbi M, Thomas A, Ramzan F, Ellington MJ, et al. Factors that impact on the  
423 burden of *Escherichia coli* bacteraemia: multivariable regression analysis of 2011–2015 data from West  
424 London. *J Hosp Infect* 2019. <https://doi.org/10.1016/j.jhin.2018.10.024>.
- 425 [8] Wilson J. Applying Pareto analysis to reducing *Escherichia coli* bloodstream infections. *J Infect Prev*  
426 2018;19. <https://doi.org/10.1177/1757177418795298>.
- 427 [9] Otter JA, Galletly TJ, Davies F, Hitchcock J, Gilchrist MJ, Dyakova E, et al. Planning to halve Gram-  
428 negative bloodstream infection: getting to grips with healthcare-associated *Escherichia coli* bloodstream  
429 infection sources. *J Hosp Infect* 2019. <https://doi.org/10.1016/j.jhin.2018.07.033>.
- 430 [10] Köhler CD, Dobrindt U. What defines extraintestinal pathogenic *Escherichia coli*? *Int J Med Microbiol*  
431 2011. <https://doi.org/10.1016/j.ijmm.2011.09.006>.
- 432 [11] Day MJ, Doumith M, Abernethy J, Hope R, Reynolds R, Wain J, et al. Population structure of *Escherichia*  
433 *coli* causing bacteraemia in the UK and Ireland between 2001 and 2010. *J Antimicrob Chemother* 2016.  
434 <https://doi.org/10.1093/jac/dkw145>.
- 435 [12] Banerjee R, Johnson JR. A new clone sweeps clean: The enigmatic emergence of *Escherichia coli* sequence  
436 type 131. *Antimicrob Agents Chemother* 2014. <https://doi.org/10.1128/AAC.02824-14>.
- 437 [13] Stoesser N, Sheppard AE, Pankhurst L, de Maio N, Moore CE, Sebra R, et al. Evolutionary history of the  
438 global emergence of the *Escherichia coli* epidemic clone ST131. *MBio* 2016.



- 439 <https://doi.org/10.1128/mBio.02162-15>.
- 440 [14] Price LB, Johnson JR, Aziz M, Clabots C, Johnston B, Tchesnokova V, et al. The epidemic of extended-  
441 spectrum- $\beta$ -lactamase-producing *Escherichia coli* ST131 is driven by a single highly pathogenic subclone,  
442 H30-Rx. *MBio* 2013. <https://doi.org/10.1128/mBio.00377-13>.
- 443 [15] Kallonen T, Brodrick HJ, Harris SR, Corander J, Brown NM, Martin V, et al. Systematic longitudinal  
444 survey of invasive *Escherichia coli* in England demonstrates a stable population structure only transiently  
445 disturbed by the emergence of ST131. *Genome Res* 2017. <https://doi.org/10.1101/gr.216606.116>.
- 446 [16] Johnson JR, Thuras P, Johnston BD, Weissman SJ, Limaye AP, Riddell K, et al. The Pandemic H30  
447 Subclone of *Escherichia coli* Sequence Type 131 Is Associated with Persistent Infections and Adverse  
448 Outcomes Independent from Its Multidrug Resistance and Associations with Compromised Hosts. *Clin*  
449 *Infect Dis* 2016. <https://doi.org/10.1093/cid/ciw193>.
- 450 [17] Davies J, Johnson AP, Hope R. Identifying hospital-onset *Escherichia coli* bacteraemia cases from English  
451 mandatory surveillance: the case for applying a two-day post-admission rule. *J Hosp Infect* 2017.  
452 <https://doi.org/10.1016/j.jhin.2017.06.031>.
- 453 [18] Van Walraven C, Austin PC, Jennings A, Quan H, Forster AJ. A modification of the elixhauser comorbidity  
454 measures into a point system for hospital death using administrative data. *Med Care* 2009;47:626–33.  
455 <https://doi.org/10.1097/MLR.0b013e31819432e5>.
- 456 [19] Firth D. Bias Reduction of Maximum Likelihood Estimates. *Biometrika* 1993.  
457 <https://doi.org/10.2307/2336755>.
- 458 [20] Van Smeden M, De Groot JAH, Moons KGM, Collins GS, Altman DG, Eijkemans MJC, et al. No rationale  
459 for 1 variable per 10 events criterion for binary logistic regression analysis. *BMC Med Res Methodol* 2016.  
460 <https://doi.org/10.1186/s12874-016-0267-3>.
- 461 [21] Ben Zakour NL, Alsheikh-Hussain AS, Ashcroft MM, Khanh Nhu NT, Roberts LW, Stanton-Cook M, et al.  
462 Sequential acquisition of virulence and fluoroquinolone resistance has shaped the evolution of *Escherichia*  
463 *coli* ST131. *MBio* 2016. <https://doi.org/10.1128/mBio.00347-16>.
- 464 [22] Baltas I, Stockdale T, Tausan M, Kashif A, Anwar J, Anvar J, et al. Impact of antibiotic timing on mortality  
465 from Gram-negative bacteraemia in an English district general hospital: the importance of getting it right  
466 every time. *J Antimicrob Chemother* 2021;76. <https://doi.org/10.1093/jac/dkaa478>.

- 467 [23] Evans RN, Pike K, Rogers CA, Reynolds R, Stoddart M, Howe R, et al. Modifiable healthcare factors  
468 affecting 28-day survival in bloodstream infection: A prospective cohort study. *BMC Infect Dis* 2020;20.  
469 <https://doi.org/10.1186/s12879-020-05262-6>.
- 470 [24] Goswami C, Fox S, Holden M, Connor M, Leanord A, Evans TJ. Genetic analysis of invasive escherichia  
471 coli in scotland reveals determinants of healthcare-associated versus communityacquired infections. *Microb*  
472 *Genomics* 2018;4. <https://doi.org/10.1099/mgen.0.000190>.
- 473 [25] Trotter CL, Chandra M, Cano R, Larrauri A, Ramsay ME, Brehony C, et al. A surveillance network for  
474 meningococcal disease in Europe. *FEMS Microbiol Rev* 2007;31. [https://doi.org/10.1111/j.1574-](https://doi.org/10.1111/j.1574-6976.2006.00060.x)  
475 [6976.2006.00060.x](https://doi.org/10.1111/j.1574-6976.2006.00060.x).
- 476 [26] Olesen B, Frimodt-Møller J, Leihof RF, Struve C, Johnston B, Hansen DS, et al. Temporal trends in  
477 antimicrobial resistance and virulence-associated traits within the Escherichia coli sequence type 131 clonal  
478 group and its H30 and H30-Rx Subclones, 1968 to 2012. *Antimicrob Agents Chemother* 2014;58.  
479 <https://doi.org/10.1128/AAC.03679-14>.
- 480 [27] Salas-Mera D, Sainz T, Gómez-Gil Mira MR, Méndez-Echevarría A. Gentamicin resistant E. coli as a cause  
481 of urinary tract infections in children. *Enferm Infecc Microbiol Clin* 2017;35.  
482 <https://doi.org/10.1016/j.eimc.2016.11.001>.
- 483 [28] Vidal L, Gafter-Gvili A, Borok S, Fraser A, Leibovici L, Paul M. Efficacy and safety of aminoglycoside  
484 monotherapy: Systematic review and meta-analysis of randomized controlled trials. *J Antimicrob*  
485 *Chemother* 2007;60. <https://doi.org/10.1093/jac/dkm193>.
- 486 [29] Shankar-Hari M, Rubenfeld GD. Race, Ethnicity, and Sepsis: Beyond Adjusted Odds Ratios. *Crit Care Med*  
487 2018. <https://doi.org/10.1097/CCM.0000000000003060>.
- 488 [30] Ayoubkhani D, Nafilyan V, White C, Goldblatt P, Gaughan C, Blackwell L, et al. Ethnic-minority groups in  
489 England and Wales-factors associated with the size and timing of elevated COVID-19 mortality: a  
490 retrospective cohort study linking census and death records. *Int J Epidemiol* 2021;49.  
491 <https://doi.org/10.1093/ije/dyaa208>.

492  
493

494 **Tables**

495 **Table 1. Summary of patient characteristics and association with specific *E. coli* sequence type (n=300**  
 496 **patients).**

497

|                           | ST131-C2<br>(n=36) | ST131-other<br>(n=28) | ST69<br>(n=31) | ST73<br>(n=43) | ST95<br>(n=21) | Other STs<br>(n=114) | Total<br>(n=300) |
|---------------------------|--------------------|-----------------------|----------------|----------------|----------------|----------------------|------------------|
| <b>Sex</b>                |                    |                       |                |                |                |                      |                  |
| <b>Male</b>               | 20 (55.6%)         | 16 (57.1%)            | 8 (25.8%)      | 20 (46.5%)     | 8 (38.1%)      | 65 (48.6%)           | 144 (48.0%)      |
| <b>Female</b>             | 16 (44.4%)         | 12 (42.9%)            | 23 (74.2%)     | 23 (53.5%)     | 13 (61.9%)     | 69 (51.4%)           | 156 (52.0%)      |
| <b>Age</b>                |                    |                       |                |                |                |                      |                  |
| <b>&lt; 65</b>            | 11 (30.6%)         | 14 (50.0%)            | 17 (54.8%)     | 19 (44.2%)     | 9 (42.9%)      | 61 (43.3%)           | 131 (43.7%)      |
| <b>65-74</b>              | 12 (33.3%)         | 6 (21.4%)             | 4 (12.9%)      | 7 (16.3%)      | 4 (19.0%)      | 35 (24.8%)           | 68 (22.7%)       |
| <b>75-84</b>              | 6 (16.7%)          | 6 (21.4%)             | 8 (25.8%)      | 8 (18.6%)      | 6 (28.6%)      | 33 (23.4%)           | 67 (22.3%)       |
| <b>85+</b>                | 7 (19.4%)          | 2 (7.1%)              | 2 (6.5%)       | 9 (20.9%)      | 2 (9.5%)       | 12 (8.5%)            | 34 (11.3%)       |
| <b>Ethnicity</b>          |                    |                       |                |                |                |                      |                  |
| <b>White</b>              | 16 (44.4%)         | 10 (35.7%)            | 16 (51.6%)     | 28 (65.1%)     | 10 (47.6%)     | 65 (46.1%)           | 145 (48.3%)      |
| <b>Asian</b>              | 9 (25.0%)          | 5 (17.9%)             | 4 (12.9%)      | 2 (4.7%)       | 2 (9.5%)       | 19 (13.5%)           | 41 (16.7%)       |
| <b>Black</b>              | 4 (11.1%)          | 5 (17.9%)             | 3 (9.7%)       | 2 (4.7%)       | 2 (9.5%)       | 17 (12.1%)           | 33 (11.0%)       |
| <b>Any Other</b>          | 6 (16.7%)          | 2 (7.1%)              | 5 (16.1%)      | 4 (9.3%)       | 3 (14.3%)      | 24 (17.0%)           | 44 (14.7%)       |
| <b>Not Given</b>          | 1 (2.8%)           | 6 (21.4%)             | 3 (9.7%)       | 7 (16.3%)      | 4 (19.0%)      | 16 (11.3%)           | 37 (12.3%)       |
| <b>Elixhauser score</b>   |                    |                       |                |                |                |                      |                  |
| <b>&lt;0</b>              | 0 (0%)             | 0 (0%)                | 0 (0%)         | 3 (7.0%)       | 0 (0%)         | 7 (5.0%)             | 10 (3.3%)        |
| <b>Zero</b>               | 11 (30.6%)         | 3 (10.7%)             | 11 (35.5%)     | 8 (18.6%)      | 6 (28.6%)      | 30 (21.3%)           | 69 (23.0%)       |
| <b>1 to 5</b>             | 8 (22.2%)          | 6 (21.4%)             | 9 (29.0%)      | 8 (18.6%)      | 2 (9.5%)       | 29 (20.6%)           | 62 (20.7%)       |
| <b>6 to 13</b>            | 9 (25.0%)          | 11 (39.3%)            | 6 (19.4%)      | 18 (41.9%)     | 10 (47.6%)     | 36 (25.5%)           | 90 (30.0%)       |
| <b>≥14</b>                | 8 (22.2%)          | 8 (28.6%)             | 5 (16.1%)      | 6 (14.0%)      | 3 (14.3%)      | 39 (27.7%)           | 69 (23.0%)       |
| <b>Onset of infection</b> |                    |                       |                |                |                |                      |                  |
| <b>Hospital</b>           | 15 (41.7%)         | 11 (39.3%)            | 7 (22.6%)      | 8 (18.6%)      | 2 (9.5%)       | 32 (22.7%)           | 75 (25.0%)       |
| <b>Community</b>          | 20 (55.6%)         | 17 (60.7%)            | 21 (67.7%)     | 35 (81.4%)     | 19 (90.5%)     | 104 (73.8%)          | 225 (75.0%)      |

498  
499

500  
 501 **Table 2. Summary of results for testing association between *E. coli* sequence type and patient outcome**  
 502 **(n=300 patients).**

503

| <b>Outcome</b>                                 | <b>ST131-C2<br/>(n=36)</b> | <b>ST131-other<br/>(n=28)</b> | <b>ST69<br/>(n=31)</b> | <b>ST73<br/>(n=43)</b> | <b>ST95<br/>(n=21)</b> | <b>Other STs<br/>(n=141)</b> | <b>Total<br/>(n=300)</b> |
|------------------------------------------------|----------------------------|-------------------------------|------------------------|------------------------|------------------------|------------------------------|--------------------------|
| <b>Mortality</b>                               |                            |                               |                        |                        |                        |                              |                          |
| <b>Within 7 days n (%)</b>                     | 1<br>(2.8%)                | 4<br>(14.3%)                  | 1<br>(3.2%)            | 3<br>(7.0%)            | 1<br>(4.8%)            | 11<br>(7.8%)                 | 21<br>(7.0%)             |
| <b>Within 30 days n (%)</b>                    | 2<br>(5.6%)                | 6<br>(21.4%)                  | 2<br>(6.5%)            | 3<br>(7.0%)            | 2<br>(9.5%)            | 18<br>(12.8%)                | 33<br>(11.0%)            |
| <b>Within 90 days n (%)</b>                    | 4<br>(11.1%)               | 10<br>(35.7%)                 | 3<br>(9.7%)            | 3<br>(7.0%)            | 2<br>(9.5%)            | 25<br>(17.7%)                | 47<br>(15.7%)            |
| <b>Length-of-stay post infection</b>           |                            |                               |                        |                        |                        |                              |                          |
| <b>Median (IQR)</b>                            | 18.5<br>(11.25, 27.0)      | 12.5<br>(6, 28.75)            | 9<br>(7, 15)           | 7<br>(5, 13)           | 11<br>(6, 20)          | 9<br>(11.25, 27)             | 10<br>(6, 20)            |
| <b>(min, max)</b>                              | (1, 75)                    | (1, 50)                       | (1, 62)                | (0, 90)                | (1, 64)                | (0, 91)                      | (1, 62)                  |
| <b>Patients who have stayed 7 or more days</b> | 32<br>(94.1%)              | 20<br>(71.4%)                 | 22<br>(78.6%)          | 25<br>(58.1%)          | 14<br>(66.7%)          | 91<br>(66.9%)                | 204<br>(68%)             |

504  
 505  
 506

507 **Table 3. Multiple regression modelling of association between *E. coli* genotype, patient characteristics, antibiotic resistance and mortality within 90**  
 508 **days.**

509

|                              | ST Group – unadjusted | Model 1: ST Group adjusted for patient characteristics | Model 2: Model 1 + fluoroquinolone non-susceptibility | Model 3: Model 1 + gentamicin non-susceptibility | Model 4: Model 1 + 3 <sup>rd</sup> gen cephalosporins non-susceptibility | Model 5: Model 1 + tazocin non-susceptibility |
|------------------------------|-----------------------|--------------------------------------------------------|-------------------------------------------------------|--------------------------------------------------|--------------------------------------------------------------------------|-----------------------------------------------|
| <i>E. coli</i> ST            |                       |                                                        |                                                       |                                                  |                                                                          |                                               |
| <b>Other STs<sup>R</sup></b> |                       |                                                        |                                                       |                                                  |                                                                          |                                               |
| ST131-C2                     | 0.58 (0.16, 1.63)     | 0.68 (0.18, 2.21)                                      | 0.38 (0.09, 1.43)                                     | 0.43 (0.10, 1.52)                                | 0.37 (0.08, 1.54)                                                        | 1.06 (0.25, 3.89)                             |
| ST131-other                  | 2.58 (1.04, 6.19)*    | 2.70 (0.97, 7.50)                                      | 2.18 (0.75, 6.22)                                     | 2.42 (0.86, 6.78)                                | 2.22 (0.74, 6.51)                                                        | 2.55 (0.87, 7.39)                             |
| ST69                         | 0.50 (0.11, 1.55)     | 0.68 (0.11, 2.81)                                      | 0.89 (0.15, 3.74)                                     | 0.76 (0.13, 3.24)                                | 0.68 (0.12, 2.84)                                                        | 0.69 (0.11, 2.84)                             |
| ST73                         | 0.35 (0.08, 1.06)     | 0.55 (0.13, 1.83)                                      | 0.65 (0.15, 2.25)                                     | 0.68 (0.15, 2.34)                                | 0.56 (0.13, 1.89)                                                        | 0.70 (0.16, 2.42)                             |
| ST95                         | 0.49 (0.07, 1.83)     | 0.80 (0.14, 3.20)                                      | 1.02 (0.18, 4.26)                                     | 0.90 (0.15, 3.70)                                | 0.74 (0.13, 3.00)                                                        | 0.82 (0.14, 3.30)                             |
| <b>Patient's age group</b>   |                       |                                                        |                                                       |                                                  |                                                                          |                                               |
| <65 <sup>R</sup>             |                       |                                                        |                                                       |                                                  |                                                                          |                                               |
| 65-74                        |                       | 0.87 (0.28, 2.59)                                      | 0.81 (0.25, 2.46)                                     | 0.84 (0.26, 2.60)                                | 0.91 (0.28, 2.78)                                                        | 0.74 (0.22, 2.30)                             |
| 75-84                        |                       | 1.10 (0.43, 2.78)                                      | 1.17 (0.45, 3.02)                                     | 1.18 (0.45, 3.05)                                | 1.24 (0.48, 3.21)                                                        | 1.19 (0.45, 3.12)                             |
| >85                          |                       | 1.85 (0.52, 6.22)                                      | 1.95 (0.54, 6.63)                                     | 2.01 (0.56, 6.88)                                | 1.90 (0.51, 6.71)                                                        | 1.73 (0.47, 5.90)                             |
| <b>Patient's sex</b>         |                       |                                                        |                                                       |                                                  |                                                                          |                                               |
| Male <sup>R</sup>            |                       |                                                        |                                                       |                                                  |                                                                          |                                               |
| Female                       |                       | 0.68 (0.31, 1.49)                                      | 0.75 (0.33, 1.69)                                     | 0.71 (0.32, 1.58)                                | 0.71 (0.32, 1.59)                                                        | 0.73 (0.32, 1.65)                             |
| <b>Patient's ethnicity</b>   |                       |                                                        |                                                       |                                                  |                                                                          |                                               |
| White <sup>R</sup>           |                       |                                                        |                                                       |                                                  |                                                                          |                                               |
| Asian                        |                       | 1.19 (0.38, 3.51)                                      | 0.92 (0.28, 2.82)                                     | 1.28 (0.40, 3.90)                                | 1.12 (0.32, 3.54)                                                        | 1.04 (0.31, 3.25)                             |
| Black                        |                       | 2.60 (0.90, 7.44)                                      | 2.27 (0.76, 6.58)                                     | 2.98 (1.03, 8.56)*                               | 2.91 (0.97, 8.58)                                                        | 3.09 (1.02, 9.26)*                            |
| Other                        |                       | 1.32 (0.37, 4.45)                                      | 1.12 (0.30, 3.87)                                     | 1.35 (0.35, 4.82)                                | 1.33 (0.36, 4.54)                                                        | 1.37 (0.38, 4.58)                             |
| Not stated                   |                       | 1.70 (0.49, 5.36)                                      | 1.77 (0.50, 5.70)                                     | 2.04 (0.58, 6.59)                                | 1.55 (0.45, 4.88)                                                        | 1.68 (0.43, 5.79)                             |
| <b>Elixhauser index</b>      |                       |                                                        |                                                       |                                                  |                                                                          |                                               |
| <0 <sup>R</sup>              |                       |                                                        |                                                       |                                                  |                                                                          |                                               |

|                                      |  |                        |                         |                        |                        |                        |
|--------------------------------------|--|------------------------|-------------------------|------------------------|------------------------|------------------------|
| <b>0-5</b>                           |  | 1.58 (0.28, 10.09)     | 1.61 (0.29, 10.40)      | 1.11 (0.18, 7.50)      | 1.46 (0.26, 9.22)      | 1.88 (0.34, 11.91)     |
| <b>6 to 13</b>                       |  | 3.66 (0.99, 19.79)     | 3.81 (1.01, 20.99)      | 3.35 (0.89, 18.21)     | 3.90 (1.05, 21.10)*    | 3.51 (0.93, 19.05)     |
| <b>14 or greater</b>                 |  | 18.09 (5.24, 96.31)*** | 19.91 (5.58, 109.77)*** | 18.16 (5.21, 97.23)*** | 16.48 (4.81, 87.18)*** | 16.57 (4.74, 88.42)*** |
| <b>Onset of infection</b>            |  |                        |                         |                        |                        |                        |
| <b>Community<sup>R</sup></b>         |  |                        |                         |                        |                        |                        |
| <b>Hospital</b>                      |  | 1.01 (0.44, 2.21)      | 0.90 (0.39, 2.02)       | 0.94 (0.41, 2.05)      | 0.87 (0.36, 2.00)      | 1.13 (0.47, 2.59)      |
| <b>Antibiotic susceptibility</b>     |  |                        |                         |                        |                        |                        |
| <b>Antibiotic non-susceptibility</b> |  |                        | 2.46 (0.97, 6.37)       | 3.32 (1.17, 9.72)*     | 2.15 (0.67, 6.74)      | 0.64 (0.10, 3.07)      |

Detailed clinical data and antibiotic susceptibility testing results for fluoroquinolone, gentamicin, 3<sup>rd</sup> generation cephalosporins and tazocin was available for 300 *E. coli* bacteraemia cases. Odd ratios are presented with 95% Confidence Intervals; p-values were calculated using Chi square; \* p-value of <0.05; \*\*\*p-value of <0.001; <sup>R</sup> group used as reference for the model; HO – hospital onset, CO – community onset.

510  
511  
512  
513  
514  
515  
516  
517

518 **Table 4. Multiple regression modelling of association between *E. coli* genotype, patient characteristics, antibiotic resistance and length-of-stay ( $\geq 7$  days).**

519 Detailed clinical data and antibiotic susceptibility testing results for fluoroquinolone, aminoglycoside, 3<sup>rd</sup> generation cephalosporins and tazocin from Local NHS

520 Trust was available for 300 *E. coli* bacteraemia cases.

521

|                         | ST Group – unadjusted | Model 1: ST Group adjusted for patient characteristics | Model 2: Model 1 + fluoroquinolone non-susceptibility | Model 3: Model 1 + aminoglycoside non-susceptibility | Model 4: Model 1 + 3 <sup>rd</sup> gen cephalosporins non-susceptibility | Model 5: Model 1 + tazocin non-susceptibility |
|-------------------------|-----------------------|--------------------------------------------------------|-------------------------------------------------------|------------------------------------------------------|--------------------------------------------------------------------------|-----------------------------------------------|
| <i>E. coli</i> genotype |                       |                                                        |                                                       |                                                      |                                                                          |                                               |
| Other STs <sup>R</sup>  |                       |                                                        |                                                       |                                                      |                                                                          |                                               |
| ST131-C2                | 6.46 (2.02, 32.64)*** | 6.06 (1.75, 32.15)**                                   | 4.81 (1.23, 27.10)*                                   | 5.80 (1.63, 31.13)**                                 | 8.93 (1.85, 89.15)**                                                     | 4.54(1.25, 24.94)*                            |
| ST131-other             | 1.20 (0.51, 3.01)     | 0.81 (0.32, 2.17)                                      | 0.71 (0.27, 1.95)                                     | 0.77 (0.30, 2.11)                                    | 0.79 (0.30, 2.17)                                                        | 0.84(0.32, 2.39)                              |
| ST69                    | 1.72 (0.70, 4.76)     | 2.85 (1.07, 8.52)*                                     | 3.06 (1.14, 9.20)*                                    | 2.97 (1.10, 8.95)*                                   | 3.13 (1.17, 9.37)*                                                       | 2.82(1.04, 8.59)*                             |
| ST73                    | 0.69 (0.34, 1.39)     | 0.70 (0.33, 1.53)                                      | 0.79 (0.36, 1.77)                                     | 0.84 (0.38, 1.86)                                    | 0.79 (0.35, 1.77)                                                        | 0.82(0.35, 1.96)                              |
| ST95                    | 0.96 (0.38, 2.61)     | 1.29 (0.46, 3.85)                                      | 1.38 (0.49, 4.18)                                     | 1.31 (0.46, 3.96)                                    | 1.40 (0.50, 4.22)                                                        | 1.15(0.40, 3.54)                              |
| Patient's age group     |                       |                                                        |                                                       |                                                      |                                                                          |                                               |
| <65 <sup>R</sup>        |                       |                                                        |                                                       |                                                      |                                                                          |                                               |
| 65-74                   |                       | 1.43 (0.69, 3.04)                                      | 1.46 (0.70, 3.12)                                     | 1.41 (0.68, 3.00)                                    | 1.40 (0.66, 3.02)                                                        | 1.48(0.70, 3.23)                              |
| 75-84                   |                       | 1.61 (0.74, 3.57)                                      | 1.67 (0.77, 3.71)                                     | 1.75 (0.80, 4.00)                                    | 1.58 (0.72, 3.55)                                                        | 1.87(0.82, 4.46)                              |
| >85                     |                       | 1.64 (0.65, 4.38)                                      | 1.87 (0.72, 5.16)                                     | 1.79 (0.69, 4.95)                                    | 1.53 (0.58, 4.29)                                                        | 1.84(0.68, 5.33)                              |
| Patient's sex           |                       |                                                        |                                                       |                                                      |                                                                          |                                               |
| Male <sup>R</sup>       |                       |                                                        |                                                       |                                                      |                                                                          |                                               |
| Female                  |                       | 0.30 (0.16, 0.55)***                                   | 0.33 (0.18, 0.62)***                                  | 0.29 (0.15, 0.54)***                                 | 0.29 (0.15, 0.53)***                                                     | 0.30(0.15, 0.57)***                           |
| Patient's ethnicity     |                       |                                                        |                                                       |                                                      |                                                                          |                                               |
| White <sup>R</sup>      |                       |                                                        |                                                       |                                                      |                                                                          |                                               |
| Asian                   |                       | 1.26 (0.52, 3.26)                                      | 1.15 (0.47, 3.02)                                     | 1.56 (0.62, 4.24)                                    | 1.14 (0.46, 3.01)                                                        | 1.53(0.58, 4.36)                              |
| Black                   |                       | 1.20 (0.45, 3.46)                                      | 1.16 (0.43, 3.35)                                     | 1.24 (0.46, 3.61)                                    | 1.03 (0.37, 3.05)                                                        | 0.93(0.33, 2.80)                              |
| Other                   |                       | 0.78 (0.34, 1.83)                                      | 0.77 (0.34, 1.81)                                     | 0.78 (0.34, 1.84)                                    | 0.68 (0.28, 1.64)                                                        | 0.81(0.34, 1.98)                              |

|                                      |  |                     |                     |                     |                    |                     |
|--------------------------------------|--|---------------------|---------------------|---------------------|--------------------|---------------------|
| <b>Not stated</b>                    |  | 0.78 (0.33, 1.87)   | 0.75 (0.32, 1.80)   | 0.79 (0.34, 1.90)   | 0.79 (0.34, 1.90)  | 0.74(0.30, 1.85)    |
| <b>Elixhauser index</b>              |  |                     |                     |                     |                    |                     |
| <b>&lt; 0<sup>R</sup></b>            |  |                     |                     |                     |                    |                     |
| <b>0-5</b>                           |  | 2.15 (0.98, 4.79)   | 2.10 (0.96, 4.68)   | 2.09 (0.95, 4.70)   | 1.93 (0.87, 4.37)  | 2.08 (0.93, 4.79)   |
| <b>6 to 13</b>                       |  | 2.71 (1.28, 5.87)** | 2.70 (1.27, 5.91)** | 2.91 (1.36, 6.41)** | 2.43 (1.11, 5.44)* | 3.36 (1.52, 7.66)** |
| <b>14 or greater</b>                 |  | 2.02 (0.87, 4.80)   | 2.06 (0.89, 4.89)   | 1.91 (0.82, 4.56)   | 1.85 (0.79, 4.46)  | 2.27 (0.94, 5.67)   |
| <b>Onset of infection</b>            |  |                     |                     |                     |                    |                     |
| <b>Community onset<sup>R</sup></b>   |  |                     |                     |                     |                    |                     |
| <b>Hospital onset</b>                |  | 2.69 (1.28, 6.08)** | 2.51 (1.18, 5.71)*  | 2.62 (1.24, 5.92)*  | 2.55 (1.17, 5.95)* | 2.55 (1.15, 6.10)*  |
| <b>Antibiotic susceptibility</b>     |  |                     |                     |                     |                    |                     |
| <b>Antibiotic non-susceptibility</b> |  |                     | 1.42 (0.65, 3.20)   | 1.14 (0.41, 3.44)   | 1.12 (0.41, 3.18)  | 0.53 (0.13, 2.31)   |

522 Odd ratios are presented with 95% Confidence Intervals; p-values were calculated using Chi square; \* p-value of <0.05; \*\*\*p-value of <0.001; <sup>R</sup> group used as  
 523 reference for the model; HO – hospital onset, CO – community onset.
